# Supplementary material
Source: HighWire-hosted journal article supplement (https://bmjopen.bmj.com/content/11/2/e044388)

**Supplementary Figure 2. Daily excess visits and 95% prediction intervals between 1th of October 2019 and the 31th of May 2020, among residents: in the city of Milan (a), in the hinterland of the city of Milan (b), in the province of Lodi (c), and outside the territory of the ATS (d).**

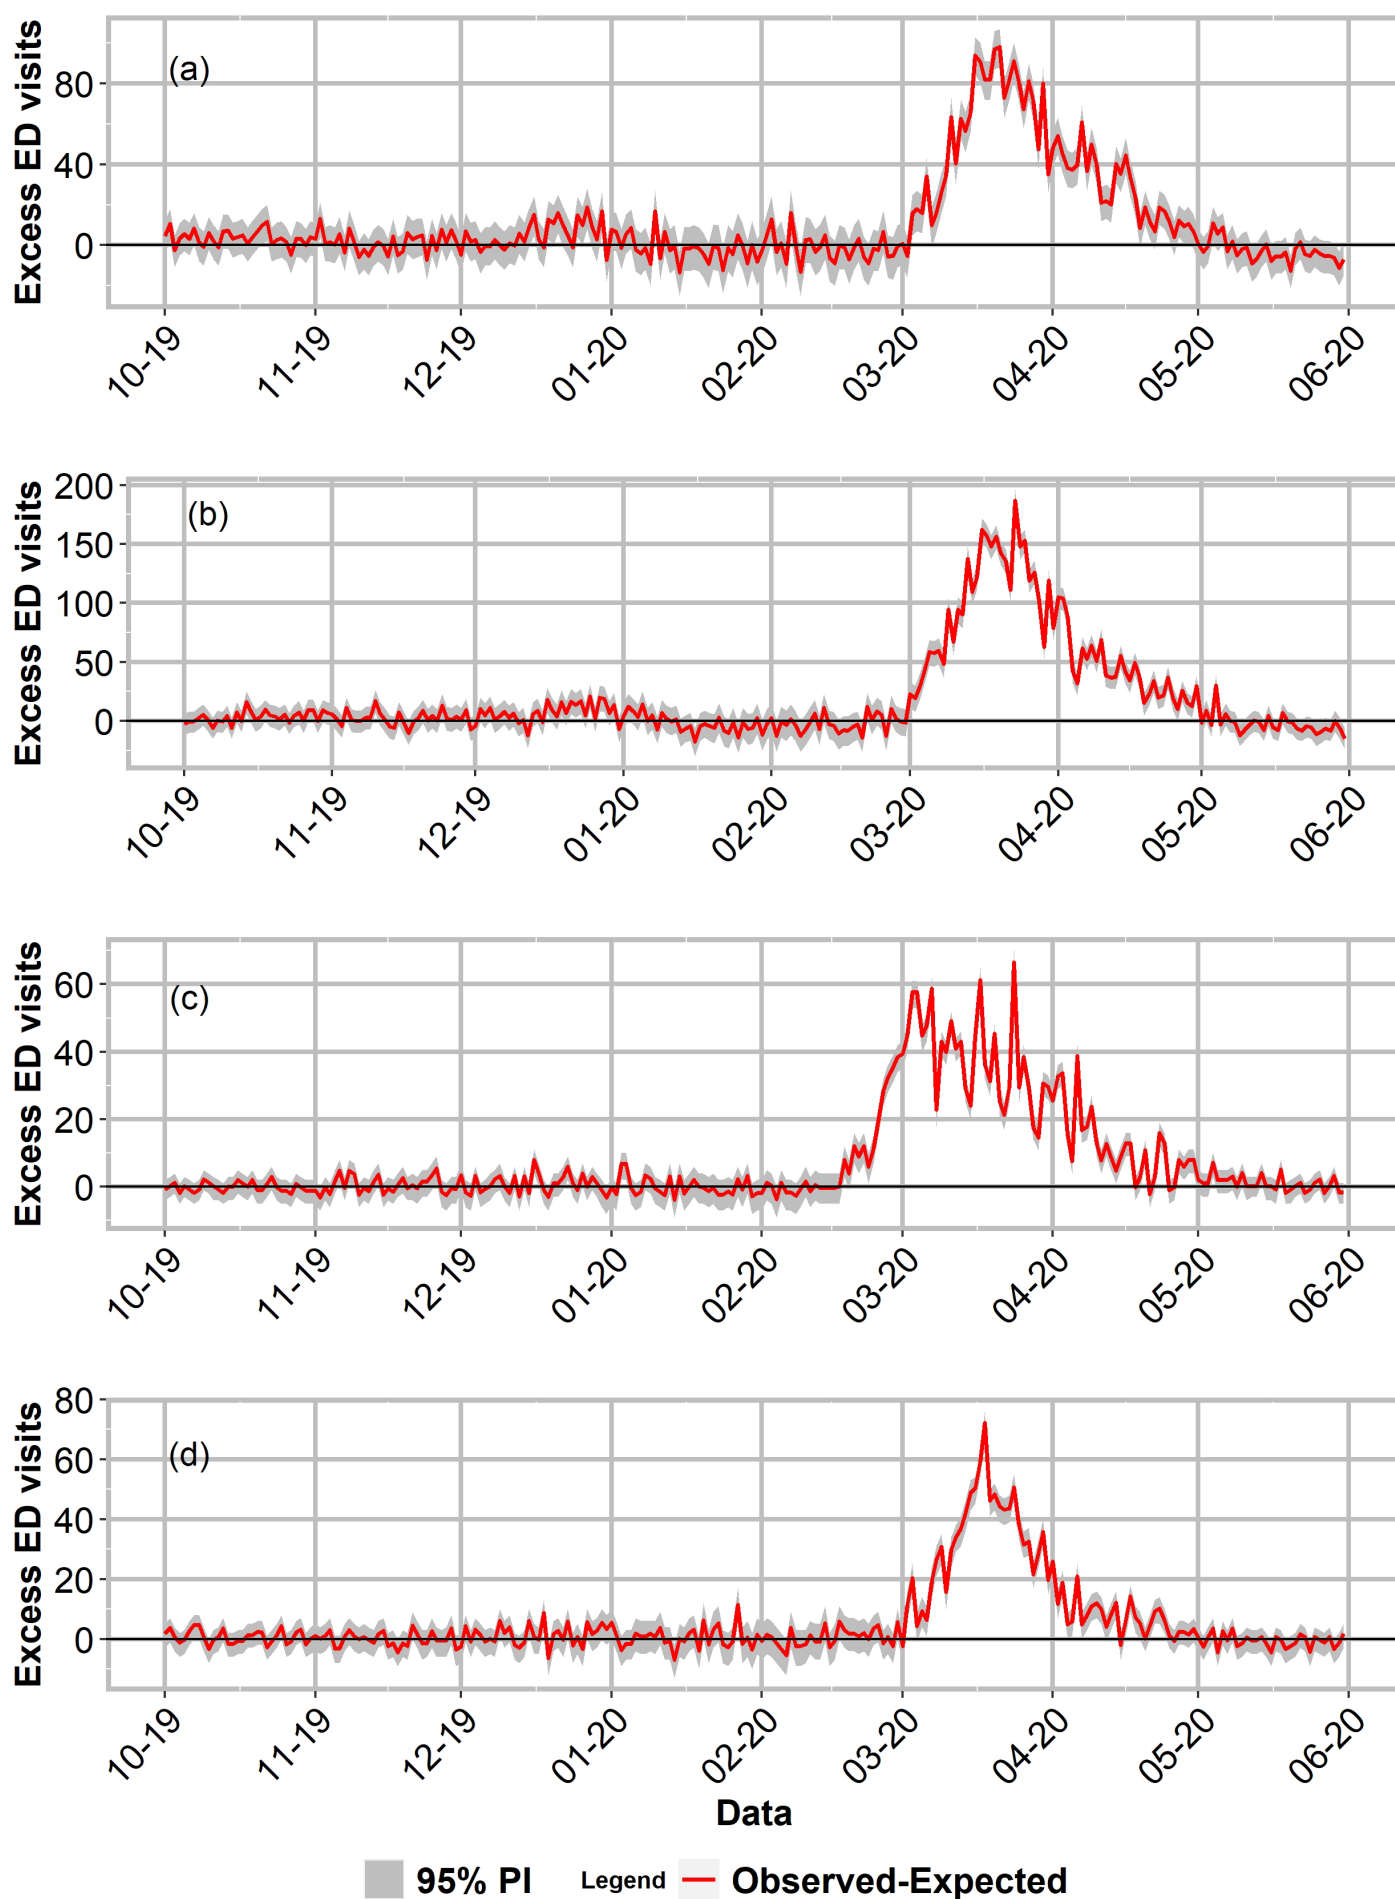

Supplement: inline-supplementary-material-3 [file inline-supplementary-material-3.pdf]
